# Supplementary material for: Planetary boundary layer height from CALIOP compared to radiosonde overChina
Source: Copernicus journal article supplement (doi:10.5194/acp-16-9951-2016), 2016-08-08
Supplement: Supplementary file 1 [file acp-16-9951-2016-supplement.pdf]

Supplement of Atmos. Chem. Phys., 16, 9951–9963, 2016  
<http://www.atmos-chem-phys.net/16/9951/2016/>  
doi:10.5194/acp-16-9951-2016-supplement  
© Author(s) 2016. CC Attribution 3.0 License.

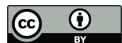

Atmospheric  
Chemistry  
and Physics  
Open Access  
EGU

*Supplement of*

## **Planetary boundary layer height from CALIOP compared to radiosonde over China**

**Wanchun Zhang et al.**

*Correspondence to:* Jianping Guo (jpguocams@gmail.com) and Panmao Zhai (pmzhai@cma.gov.cn)

The copyright of individual parts of the supplement might differ from the CC-BY 3.0 licence.

**Figure S1.** Statistics showing the fractional volumes (in percent) of lidar measurement at Beijing during the whole year of 2014 stratified by no observation (in red), without PBLH retrievals due to weather conditions (in yellow), and with PBLH retrievals (in green).

**Figure S2.** Spatial distribution of climatological PBLHs derived from radiosonde at 1400 BJT in summer (June-July-August, JJA) during the period from 2011 to 2014.

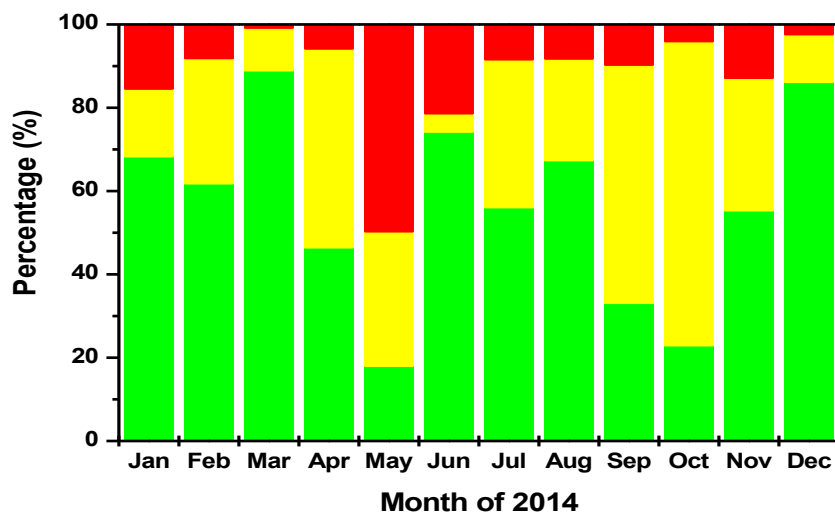

Figure S1. Statistics showing the fractional volumes (in percent) of lidar measurement at Beijing during the whole year of 2014 stratified by no observation (in red), without PBLH retrievals due to weather conditions (in yellow), and with PBLH retrievals (in green).

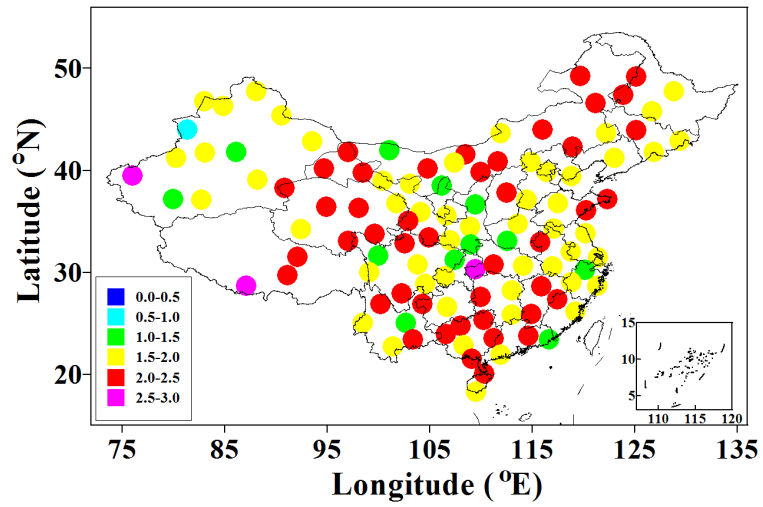

Figure S2. Spatial distribution of climatological PBLHs derived from radiosonde at 1400 BJT in summer (June-July-August, JJA) during the period from 2011 to 2014. Note that only summertime PBLHs were available for the radiosonde measurements.
